# Supplementary material for: Comparison of anti-PD-1/PD-L1-based regimens in relapsed/refractory diffuse large B-cell lymphoma: a meta-analysis
Source: PeerJ journal article supplement (doi:10.7717/peerj.20314), 2025-11-19
Supplement: raw_data.zip [file AE data.xlsx]

## Sheet: Sheet1
Treatment	study	n	AE%		Treatment	study	n	≥3AE%		Treatment	study	n	5AE%			Treatment	study	n	SAE%		Treatment	study	n	TRAE%		Treatment	study	n	TRSAE%		Treatment	study	n	irAE%		Treatment	study	n	CRS%
Monotherapy	checkmate-139/NCT02038933	121	97.5		Monotherapy	NCT02362997	31	79.3		Monotherapy	KEYNOTE-013/NCT01953692	42	4.5			Monotherapy	checkmate-139/NCT02038933	121	68.6		Monotherapy	checkmate-139/NCT02038933	121	62		Monotherapy	checkmate-139/NCT02038933	121	12		Monotherapy	checkmate-039/NCT01592370	11	34.6		Monotherapy	NCT02650999	12	8.33
	checkmate-039/NCT01592370	11	97.5		Combination with BTKi	LYM1002/nct02329847	45	81.6			FUSION NHL-001/NCT02733042	10	40				NCT02650999	12	66.7			checkmate-039/NCT01592370	11	71			KEYNOTE-013/NCT01953692	42	12.4			NCT02362997	31	34.5		Combination with CART	Mu, J2022	26	84.6
	NCT02650999	12	100			NCT02795182	27	68.1		Combination with BTKi	LYM1002/nct02329847	45	7.8				KEYNOTE-013/NCT01953692	42	52.38			KEYNOTE-013/NCT01953692	42	56.2			FUSION NHL-001/NCT02733042	10	10		Combination with BTKi	NCT02401048	34	20.5			ZUMA-6/NCT02926833	28	4
	KEYNOTE-013/NCT01953692	42	90.5		Combination with CD20mAb	NCT02220842	23	61.2			NCT02795182	27	8.7				FUSION NHL-001/NCT02733042	10	70			FUSION NHL-001/NCT02733042	10	30		Combination with BTKi	LYM1002/nct02329847	45	21.3		Combination with CTLA4mAb	CPIT-001\nct02681302	14	85.7			PORTIA\NCT03630159	12	58.3
	FUSION NHL-001/NCT02733042	10	90		Combination with CD20mAb+BEN	FUSION NHL-001/NCT02733042	10	90			keynote-145\NCT02362035	61	5.6				NCT02362997	31	25.8		Combination with BTKi	keynote-145\NCT02362035	61	88.2			NCT02795182	27	31.9		Combination with CD38mAb	NCT03769181	17	47.1			NCT02706405	12	33
Combination with BTKi	NCT02795182	27	95.7			JAVELIN/NCT02951156	11	90.9		Combination with CD20mAb	NCT02220842	23	0			Combination with BTKi	NCT02401048	34	67.65		Combination with CD20mAb+BEN	FUSION NHL-001/NCT02733042	10	90			keynote-145\NCT02362035	61	21.1		Combination with DNMTi	KEYNOTE-155/NCT02684617	38	5.3			PLATFORM\NCT03310619	10	0
	keynote-145\NCT02362035	61	99.4		Combination with CD20mAb+PV	nct02729896	21	24			QIN YAN 2023	36	0				LYM1002/nct02329847	45	54.6			JAVELIN/NCT02951156	11	90.9		Combination with CD20mAb	NCT02220842	23	16.3							-	NCT04539444	16	0.5
Combination with CD20mAb	NCT02220842	23	93.9		Combination with CART	ZUMA-6/NCT02926833	28	86		Combination with CD20mAb+BEN	FUSION NHL-001/NCT02733042	10	0				NCT02795182	27	62.7		Combination with CART	PORTIA\NCT03630159	12	66.7		Combination with CD20mAb+BEN	FUSION NHL-001/NCT02733042	10	30
Combination with CD20mAb+BEN	FUSION NHL-001/NCT02733042	10	90		Combination with CTLA4mAb	checkmate-039/NCT01592370	11	63		Combination with CD20mAb+PV	nct02729896	21	4.8				keynote-145\NCT02362035	61	46.6			NCT 04539444	16	100		Combination with CART	PORTIA\NCT03630159	12	16.7
	JAVELIN/NCT02951156	11	100		Combination with EZH2inhibitor	NCT02220842	43	48.8		Combination with CTLA4mAb	checkmate-039/NCT01592370	11	0			Combination with CD20mAb	NCT02220842	23	36.7		Combination with CTLA4mAb	checkmate-039/NCT01592370	11	78.5		Combination with CTLA4mAb	checkmate-039/NCT01592370	11	21.5
Combination with CD20mAb+PV	nct02729896	21	81		Combination with CD38mAb	NCT03769181	17	70.6		Combination with EZH2inhibitor	NCT02220842	43	4.3			Combination with CD20mAb+BEN	FUSION NHL-001/NCT02733042	10	50		Combination with CD38mAb	NCT03769181	17	52.9		Combination with EZH2inhibitor	NCT02220842	43	20.9
Combination with CART	ZUMA-6/NCT02926833	28	100		Combination with KIRinhibitor	checkmate-039/NCT01592370	26	47		Combination with CD38mAb	NCT03769181	17	23.5				JAVELIN/NCT02951156	11	63.6		Combination with KIRinhibitor	checkmate-039/NCT01592370	26	70.8		Combination with CD38mAb	NCT03769181	17	11.8
	PORTIA\NCT03630159	12	100		Combination with DNMTi	KEYNOTE-155/NCT02684617	38	78.9		Combination with KIRinhibitor	checkmate-039/NCT01592370	26	0			Combination with CD20mAb+PV	nct02729896	21	9.5		Combination with lena	KEYNOTE-013/NCT01953692	19	84.2		Combination with KIRinhibitor	checkmate-039/NCT01592370	26	5.6
	NCT 04539444	16	100		Combination with STAT3inhibitor	nct02549651	29	86.2		Combination with lena	KEYNOTE-013/NCT01953692	19	0			Combination with CART	ZUMA-6/NCT02926833	28	67.6		Combination with DNMTi	KEYNOTE-155/NCT02684617	38	65.8		Combination with lena	KEYNOTE-013/NCT01953692	19	10.5
Combination with 4-1BB agonist	NCT02253992	22	100		Combination with CD3-CD19BsAb	nct03340766	31	93.5		Combination with DNMTi	KEYNOTE-155/NCT02684617	38	5.3				NCT02706405	12	69		Combination with STAT3inhibitor	nct02549651	29	65.5		Combination with DNMTi	KEYNOTE-155/NCT02684617	38	13.2
Combination with EZH2inhibitor	NCT02220842	43	95.3		Combination with LAG3	NCT03598608	25	16		Combination with STAT3inhibitor	nct02549651	29	6.9			Combination with 4-1BBagonist	NCT02253992	22	57.5		Combination with CD20mAb	QIN YAN,2023	36	38.9		Combination with STAT3inhibitor	nct02549651	29	3.4
Combination with IDO1inhibitor	KEYNOTE-037\NCT02178722	26	99.5							Combination with LAG3	NCT03598608	25	0			Combination with EZH2inhibitor	NCT02220842	43	39.5		Combination with DPX-survivac	SPIREL	25	68
Combination with CD38mAb	NCT03769181	17	100							Combination with CART	NCT 04539444	16	0			Combination with IDO1inhibitor	KEYNOTE-037\NCT02178722	26	49.8		Combination with LAG3	NCT03598608	25	64
Combination with lena	KEYNOTE-013/NCT01953692	19	94.7													Combination with CD38mAb	NCT03769181	17	58.8
Combination with DNMTi	KEYNOTE-155/NCT02684617	38	97.4													Combination with lena	KEYNOTE-013/NCT01953692	19	26.3
Combination with STAT3inhibitor	nct02549651	29	100													Combination with DNMTi	KEYNOTE-155/NCT02684617	38	44.7
Combination with CD3-CD19 BsAb	nct03340766	31	100													Combination with STAT3inhibitor	nct02549651	29	69
																Combination with CD3-CD19BsAb	nct03340766	31	80.6
