# Supplementary material for: Comparison of anti-PD-1/PD-L1-based regimens in relapsed/refractory diffuse large B-cell lymphoma: a meta-analysis
Source: PeerJ journal article supplement (doi:10.7717/peerj.20314), 2025-11-19
Supplement: raw_data.zip [file OS data.xlsx]

## Sheet: Sheet1
group	n	OS	status		group	n	OS	status		group	n	OS	status		group	n	OS	status		group	n	OS	status		group	n	OS	status		group	n	OS	status		group	n	OS	status		group	n	OS	status		group	n	OS	status
Monotherapy	15	0	1		Combination with BTKi	12	0	1		Combination with CD20单抗+BEN	0	0	1		Combination with CD20单抗	1	0	1		Combination with 化疗	1	0	1		Combination with CART	0	0	1		Combination with EZHinhibitor	1e-06	0	1		Combination with lena	1	0	1		Combination with CDKinhibitor	0.988912	0	1		Combination with DPX-survivac	0	0	1
Monotherapy	16	1	1		Combination with BTKi	10	1	1		Combination with CD20单抗+BEN	2	1	1		Combination with CD20单抗	3	1	1		Combination with 化疗	1.95447	1	1		Combination with CART	0	1	1		Combination with EZHinhibitor	7	1	1		Combination with lena	1	1	1		Combination with CDKinhibitor	7.09813	1	1		Combination with DPX-survivac	1	1	1
Monotherapy	16	2	1		Combination with BTKi	10	2	1		Combination with CD20单抗+BEN	3	2	1		Combination with CD20单抗	3	2	1		Combination with 化疗	1e-06	2	1		Combination with CART	0	2	1		Combination with EZHinhibitor	4	2	1		Combination with lena	0	2	1		Combination with CDKinhibitor	3.92612	2	1		Combination with DPX-survivac	2	2	1
Monotherapy	11	3	1		Combination with BTKi	14	3	1		Combination with CD20单抗+BEN	4	3	1		Combination with CD20单抗	1e-06	3	1		Combination with 化疗	0.97703	3	1		Combination with CART	2	3	1		Combination with EZHinhibitor	0	3	1		Combination with lena	0	3	1		Combination with CDKinhibitor	2.0444	3	1		Combination with DPX-survivac	0	3	1
Monotherapy	7	4	1		Combination with BTKi	8	4	1		Combination with CD20单抗+BEN	1	4	1		Combination with CD20单抗	1	4	1		Combination with 化疗	5.02619	4	1		Combination with CART	0	4	1		Combination with EZHinhibitor	1	4	1		Combination with lena	1	4	1		Combination with CDKinhibitor	0	4	1		Combination with DPX-survivac	1	4	1
Monotherapy	9	5	1		Combination with BTKi	4	5	1		Combination with CD20单抗+BEN	0	5	1		Combination with CD20单抗	1.01177	5	1		Combination with 化疗	1	5	1		Combination with CART	1	5	1		Combination with EZHinhibitor	3	5	1		Combination with lena	1	5	1		Combination with CDKinhibitor	2.04006	5	1		Combination with DPX-survivac	0	5	1
Monotherapy	7	6	1		Combination with BTKi	4	6	1		Combination with CD20单抗+BEN	2	6	1		Combination with CD20单抗	2	6	1		Combination with 化疗	1	6	1		Combination with CART	6	6	1		Combination with EZHinhibitor	1	6	1		Combination with lena	3	6	1		Combination with CDKinhibitor	1.9863	6	1		Combination with DPX-survivac	1	6	1
Monotherapy	6	7	1		Combination with BTKi	10	7	1		Combination with CD20单抗+BEN	0	7	1		Combination with CD20单抗	1.96876	7	1		Combination with 化疗	4	7	1		Combination with CART	0	7	1		Combination with EZHinhibitor	2	7	1		Combination with lena	0	7	1		Combination with CDKinhibitor	1.02092	7	1		Combination with DPX-survivac	2	7	1
Monotherapy	4	8	1		Combination with BTKi	4	8	1		Combination with CD20单抗+BEN	0	8	1		Combination with CD20单抗	3	8	1		Combination with 化疗	2	8	1		Combination with CART	0	8	1		Combination with EZHinhibitor	1	8	1		Combination with lena	0	8	1		Combination with CDKinhibitor	0.966966	8	1		Combination with DPX-survivac	2	8	1
Monotherapy	3	9	1		Combination with BTKi	2	9	1		Combination with CD20单抗+BEN	0	9	1		Combination with CD20单抗	4	9	1		Combination with 化疗	1	9	1		Combination with CART	0	9	1		Combination with EZHinhibitor	0	9	1		Combination with lena	0	9	1		Combination with CDKinhibitor	1.02077	9	1		Combination with DPX-survivac	2	9	1
Monotherapy	3	10	1		Combination with BTKi	2	10	1		Combination with CD20单抗+BEN	1	10	1		Combination with CD20单抗	1.04301	10	1		Combination with 化疗	0	10	1		Combination with CART	0	10	1		Combination with EZHinhibitor	0	10	1		Combination with lena	0	10	1		Combination with CDKinhibitor	1.98645	10	1		Combination with DPX-survivac	1	10	1
Monotherapy	4	11	1		Combination with BTKi	2	11	1		Combination with CD20单抗+BEN	0	11	1		Combination with CD20单抗	0	11	1		Combination with 化疗	0	11	1		Combination with CART	0	11	1		Combination with EZHinhibitor	1	11	1		Combination with lena	0	11	1		Combination with CDKinhibitor	0.00136502	11	1		Combination with DPX-survivac	0	11	1
Monotherapy	3	12	1		Combination with BTKi	0	12	1		Combination with CD20单抗+BEN	0	12	1		Combination with CD20单抗	1	12	1		Combination with 化疗	0	12	1		Combination with CART	0	12	1		Combination with EZHinhibitor	1	12	1		Combination with lena	0	12	1		Combination with CDKinhibitor	1	12	1		Combination with DPX-survivac	0	12	1
Monotherapy	5	13	1		Combination with BTKi	4	13	1		Combination with CD20单抗+BEN	0	13	1		Combination with CD20单抗	1	13	1		Combination with 化疗	2	13	1		Combination with CART	0	13	1		Combination with EZHinhibitor	3	13	1		Combination with lena	0	13	1		Combination with CDKinhibitor	0	13	1		Combination with DPX-survivac	0	13	1
Monotherapy	1	14	1		Combination with BTKi	0	14	1		Combination with CD20单抗+BEN	0	14	1		Combination with CD20单抗	1	14	1		Combination with 化疗	2	14	1		Combination with CART	0	14	1		Combination with EZHinhibitor	0	14	1		Combination with lena	0	14	1		Combination with CDKinhibitor	1	14	1		Combination with DPX-survivac	0	14	1
Monotherapy	3	15	1		Combination with BTKi	0	15	1		Combination with CD20单抗+BEN	1	15	1		Combination with CD20单抗	1e-06	15	1		Combination with 化疗	0	15	1		Combination with CART	0	15	1		Combination with EZHinhibitor	2	15	1		Combination with lena	0	15	1		Combination with CDKinhibitor	0	15	1		Combination with DPX-survivac	0	15	1
Monotherapy	2	16	1		Combination with BTKi	0	16	1		Combination with CD20单抗+BEN	1	16	1		Combination with CD20单抗	2	16	1		Combination with 化疗	0	16	1		Combination with CART	0	16	1		Combination with EZHinhibitor	1e-06	16	1		Combination with lena	1	16	1		Combination with CDKinhibitor	0	16	1		Combination with DPX-survivac	1	16	1
Monotherapy	3	17	1		Combination with BTKi	0	17	1		Combination with CD20单抗+BEN	0	17	1		Combination with CD20单抗	2	17	1		Combination with 化疗	1	17	1		Combination with CART	0	17	1		Combination with EZHinhibitor	1e-06	17	1		Combination with lena	1	17	1		Combination with CDKinhibitor	1	17	1		Combination with DPX-survivac	1	17	1
Monotherapy	2	18	1		Combination with BTKi	0	18	1		Combination with CD20单抗+BEN	0	18	1		Combination with CD20单抗	1	18	1		Combination with 化疗	0	18	1		Combination with CART	0	18	1		Combination with EZHinhibitor	1	18	1		Combination with lena	0	18	1		Combination with CDKinhibitor	1	18	1		Combination with DPX-survivac	0	18	1
Monotherapy	0	19	1		Combination with BTKi	0	19	1		Combination with CD20单抗+BEN	0	19	1		Combination with CD20单抗	1	19	1		Combination with 化疗	1e-06	19	1		Combination with CART	0	19	1		Combination with EZHinhibitor	0	19	1		Combination with lena	0	19	1		Combination with CDKinhibitor	0	19	1		Combination with DPX-survivac	0	19	1
Monotherapy	1	20	1		Combination with BTKi	0	20	1		Combination with CD20单抗+BEN	0	20	1		Combination with CD20单抗	0	20	1		Combination with 化疗	0	20	1		Combination with CART	0	20	1		Combination with EZHinhibitor	1	20	1		Combination with lena	0	20	1		Combination with CDKinhibitor	0	20	1		Combination with DPX-survivac	0	20	1
Monotherapy	1	21	1		Combination with BTKi	0	21	1		Combination with CD20单抗+BEN	0	21	1		Combination with CD20单抗	0	21	1		Combination with 化疗	0	21	1		Combination with CART	0	21	1		Combination with EZHinhibitor	1	21	1		Combination with lena	0	21	1		Combination with CDKinhibitor	0	21	1		Combination with DPX-survivac	0	21	1
Monotherapy	1	22	1		Combination with BTKi	0	22	1		Combination with CD20单抗+BEN	0	22	1		Combination with CD20单抗	2	22	1		Combination with 化疗	1	22	1		Combination with CART	0	22	1		Combination with EZHinhibitor	1	22	1		Combination with lena	0	22	1		Combination with CDKinhibitor	1	22	1		Combination with DPX-survivac	0	22	1
Monotherapy	1	23	1		Combination with BTKi	0	23	1		Combination with CD20单抗+BEN	0	23	1		Combination with CD20单抗	0	23	1		Combination with 化疗	0	23	1		Combination with CART	0	0	0		Combination with EZHinhibitor	1	23	1		Combination with lena	0	23	1		Combination with CDKinhibitor	1	23	1		Combination with DPX-survivac	0	23	1
Monotherapy	0	24	1		Combination with BTKi	0	24	1		Combination with CD20单抗+BEN	0	24	1		Combination with CD20单抗	0	24	1		Combination with 化疗	0	0	0		Combination with CART	0	1	0		Combination with EZHinhibitor	2	24	1		Combination with lena	0	24	1		Combination with CDKinhibitor	1	24	1		Combination with DPX-survivac	1	24	1
Monotherapy	1	25	1		Combination with BTKi	4	0	0		Combination with CD20单抗+BEN	0	0	0		Combination with CD20单抗	0	25	1		Combination with 化疗	0	1	0		Combination with CART	0	2	0		Combination with EZHinhibitor	1e-06	25	1		Combination with lena	0	25	1		Combination with CDKinhibitor	0	25	1		Combination with DPX-survivac	0	25	1
Monotherapy	0	26	1		Combination with BTKi	4	1	0		Combination with CD20单抗+BEN	1	1	0		Combination with CD20单抗	0	26	1		Combination with 化疗	0	2	0		Combination with CART	0	3	0		Combination with EZHinhibitor	0.0574286	26	1		Combination with lena	0	26	1		Combination with CDKinhibitor	0	26	1		Combination with DPX-survivac	0	26	1
Monotherapy	0	27	1		Combination with BTKi	2	2	0		Combination with CD20单抗+BEN	0	2	0		Combination with CD20单抗	0	27	1		Combination with 化疗	0	3	0		Combination with CART	1	4	0		Combination with EZHinhibitor	1e-06	27	1		Combination with lena	0	27	1		Combination with CDKinhibitor	1	27	1		Combination with DPX-survivac	0	27	1
Monotherapy	0	28	1		Combination with BTKi	0	3	0		Combination with CD20单抗+BEN	0	3	0		Combination with CD20单抗	0	28	1		Combination with 化疗	1	4	0		Combination with CART	0	5	0		Combination with EZHinhibitor	1e-06	28	1		Combination with lena	1	28	1		Combination with CDKinhibitor	0	28	1		Combination with DPX-survivac	0	28	1
Monotherapy	0	29	1		Combination with BTKi	4	4	0		Combination with CD20单抗+BEN	0	4	0		Combination with CD20单抗	0	29	1		Combination with 化疗	1	5	0		Combination with CART	0	6	0		Combination with EZHinhibitor	0	29	1		Combination with lena	0	29	1		Combination with CDKinhibitor	0	29	1		Combination with DPX-survivac	0	29	1
Monotherapy	0	30	1		Combination with BTKi	2	5	0		Combination with CD20单抗+BEN	0	5	0		Combination with CD20单抗	0	30	1		Combination with 化疗	1	6	0		Combination with CART	1	7	0		Combination with EZHinhibitor	1	0	0		Combination with lena	0	30	1		Combination with CDKinhibitor	0	30	1		Combination with DPX-survivac	0	30	1
Monotherapy	1	31	1		Combination with BTKi	0	6	0		Combination with CD20单抗+BEN	0	6	0		Combination with CD20单抗	0	31	1		Combination with 化疗	0	7	0		Combination with CART	1	8	0		Combination with EZHinhibitor	1	1	0		Combination with lena	0	31	1		Combination with CDKinhibitor	0	31	1		Combination with DPX-survivac	0	31	1
Monotherapy	0	32	1		Combination with BTKi	0	7	0		Combination with CD20单抗+BEN	0	7	0		Combination with CD20单抗	0	32	1		Combination with 化疗	0	8	0		Combination with CART	1	9	0		Combination with EZHinhibitor	1	2	0		Combination with lena	0	32	1		Combination with CDKinhibitor	1	32	1		Combination with DPX-survivac	0	32	1
Monotherapy	0	33	1		Combination with BTKi	0	8	0		Combination with CD20单抗+BEN	0	8	0		Combination with CD20单抗	1	33	1		Combination with 化疗	0	9	0		Combination with CART	1	10	0		Combination with EZHinhibitor	0	3	0		Combination with lena	0	33	1		Combination with CDKinhibitor	0	33	1		Combination with DPX-survivac	0	33	1
Monotherapy	0	34	1		Combination with BTKi	2	9	0		Combination with CD20单抗+BEN	0	9	0		Combination with CD20单抗	0	34	1		Combination with 化疗	1	10	0		Combination with CART	0	11	0		Combination with EZHinhibitor	0	4	0		Combination with lena	0	34	1		Combination with CDKinhibitor	0	34	1		Combination with DPX-survivac	0	34	1
Monotherapy	0	35	1		Combination with BTKi	0	10	0		Combination with CD20单抗+BEN	0	10	0		Combination with CD20单抗	1	35	1		Combination with 化疗	1	11	0		Combination with CART	1	12	0		Combination with EZHinhibitor	0	5	0		Combination with lena	0	35	1		Combination with CDKinhibitor	0	35	1		Combination with DPX-survivac	0	35	1
Monotherapy	0	36	1		Combination with BTKi	0	11	0		Combination with CD20单抗+BEN	0	11	0		Combination with CD20单抗	0	36	1		Combination with 化疗	1	12	0		Combination with CART	1	13	0		Combination with EZHinhibitor	0	6	0		Combination with lena	0	36	1		Combination with CDKinhibitor	0	36	1		Combination with DPX-survivac	0	36	1
Monotherapy	0	37	1		Combination with BTKi	0	12	0		Combination with CD20单抗+BEN	0	12	0		Combination with CD20单抗	0	37	1		Combination with 化疗	2	13	0		Combination with CART	0	14	0		Combination with EZHinhibitor	0	7	0		Combination with lena	0	37	1		Combination with CDKinhibitor	0	37	1		Combination with DPX-survivac	0	37	1
Monotherapy	1	38	1		Combination with BTKi	2	13	0		Combination with CD20单抗+BEN	3	13	0		Combination with CD20单抗	0	38	1		Combination with 化疗	2	14	0		Combination with CART	0	15	0		Combination with EZHinhibitor	0	8	0		Combination with lena	1	38	1		Combination with CDKinhibitor	0	38	1		Combination with DPX-survivac	0	38	1
Monotherapy	0	39	1		Combination with BTKi	6	14	0		Combination with CD20单抗+BEN	0	14	0		Combination with CD20单抗	0	39	1		Combination with 化疗	1	15	0		Combination with CART	0	16	0		Combination with EZHinhibitor	0	9	0		Combination with lena	0	39	1		Combination with CDKinhibitor	0	39	1		Combination with DPX-survivac	0	39	1
Monotherapy	0	40	1		Combination with BTKi	0	15	0		Combination with CD20单抗+BEN	1	15	0		Combination with CD20单抗	0	40	1		Combination with 化疗	1	16	0		Combination with CART	0	17	0		Combination with EZHinhibitor	0	10	0		Combination with lena	0	40	1		Combination with CDKinhibitor	0	40	1		Combination with DPX-survivac	0	40	1
Monotherapy	0	41	1		Combination with BTKi	2	16	0		Combination with CD20单抗+BEN	0	16	0		Combination with CD20单抗	0	41	1		Combination with 化疗	0	17	0		Combination with CART	0	18	0		Combination with EZHinhibitor	0	11	0		Combination with lena	0	41	1		Combination with CDKinhibitor	0	41	1		Combination with DPX-survivac	0	41	1
Monotherapy	0	42	1		Combination with BTKi	2	17	0		Combination with CD20单抗+BEN	0	17	0		Combination with CD20单抗	0	42	1		Combination with 化疗	1	18	0		Combination with CART	0	19	0		Combination with EZHinhibitor	0	12	0		Combination with lena	0	42	1		Combination with CDKinhibitor	0	42	1		Combination with DPX-survivac	0	0	0
Monotherapy	0	43	1		Combination with BTKi	10	18	0		Combination with CD20单抗+BEN	0	18	0		Combination with CD20单抗	0	43	1		Combination with 化疗	0	19	0		Combination with CART	1	20	0		Combination with EZHinhibitor	0	13	0		Combination with lena	0	43	1		Combination with CDKinhibitor	0	43	1		Combination with DPX-survivac	1	1	0
Monotherapy	0	44	1		Combination with BTKi	8	19	0		Combination with CD20单抗+BEN	0	19	0		Combination with CD20单抗	0	44	1		Combination with 化疗	1	20	0		Combination with CART	0	21	0		Combination with EZHinhibitor	0	14	0		Combination with lena	0	44	1		Combination with CDKinhibitor	0	0	0		Combination with DPX-survivac	0	2	0
Monotherapy	0	45	1		Combination with BTKi	14	20	0		Combination with CD20单抗+BEN	0	20	0		Combination with CD20单抗	0	45	1		Combination with 化疗	1	21	0		Combination with CART	1	22	0		Combination with EZHinhibitor	0	15	0		Combination with lena	0	45	1		Combination with CDKinhibitor	0	1	0		Combination with DPX-survivac	0	3	0
Monotherapy	1	46	1		Combination with BTKi	2	21	0		Combination with CD20单抗+BEN	0	21	0		Combination with CD20单抗	0	46	1		Combination with 化疗	1	22	0							Combination with EZHinhibitor	1	16	0		Combination with lena	0	46	1		Combination with CDKinhibitor	0	2	0		Combination with DPX-survivac	0	4	0
Monotherapy	0	47	1		Combination with BTKi	2	22	0		Combination with CD20单抗+BEN	0	22	0		Combination with CD20单抗	0	47	1		Combination with 化疗	1	23	0							Combination with EZHinhibitor	1	17	0		Combination with lena	0	47	1		Combination with CDKinhibitor	0	3	0		Combination with DPX-survivac	1	5	0
Monotherapy	0	48	1		Combination with BTKi	4	23	0		Combination with CD20单抗+BEN	1	23	0		Combination with CD20单抗	0	48	1												Combination with EZHinhibitor	0	18	0		Combination with lena	0	0	0		Combination with CDKinhibitor	0	4	0		Combination with DPX-survivac	0	6	0
Monotherapy	0	49	1		Combination with BTKi	0	24	0		Combination with CD20单抗+BEN	0	24	0		Combination with CD20单抗	0	49	1												Combination with EZHinhibitor	1	19	0		Combination with lena	0	1	0		Combination with CDKinhibitor	0	5	0		Combination with DPX-survivac	0	7	0
Monotherapy	0	50	1												Combination with CD20单抗	0	50	1												Combination with EZHinhibitor	0	20	0		Combination with lena	0	2	0		Combination with CDKinhibitor	0	6	0		Combination with DPX-survivac	0	8	0
Monotherapy	0	51	1												Combination with CD20单抗	0	51	1												Combination with EZHinhibitor	0	21	0		Combination with lena	0	3	0		Combination with CDKinhibitor	0	7	0		Combination with DPX-survivac	0	9	0
Monotherapy	0	52	1												Combination with CD20单抗	0	52	1												Combination with EZHinhibitor	0	22	0		Combination with lena	0	4	0		Combination with CDKinhibitor	0	8	0		Combination with DPX-survivac	0	10	0
Monotherapy	0	53	1												Combination with CD20单抗	0	53	1												Combination with EZHinhibitor	0	23	0		Combination with lena	0	5	0		Combination with CDKinhibitor	0	9	0		Combination with DPX-survivac	0	11	0
Monotherapy	0	54	1												Combination with CD20单抗	0	54	1												Combination with EZHinhibitor	0	24	0		Combination with lena	0	6	0		Combination with CDKinhibitor	0	10	0		Combination with DPX-survivac	1	12	0
Monotherapy	0	55	1												Combination with CD20单抗	1	0	0												Combination with EZHinhibitor	1	25	0		Combination with lena	0	7	0		Combination with CDKinhibitor	0	11	0		Combination with DPX-survivac	1	13	0
Monotherapy	0	56	1												Combination with CD20单抗	0	1	0												Combination with EZHinhibitor	1	26	0		Combination with lena	0	8	0		Combination with CDKinhibitor	0	12	0		Combination with DPX-survivac	1	14	0
Monotherapy	0	57	1												Combination with CD20单抗	1	2	0												Combination with EZHinhibitor	0	27	0		Combination with lena	0	9	0		Combination with CDKinhibitor	0	13	0		Combination with DPX-survivac	0	15	0
Monotherapy	0	58	1												Combination with CD20单抗	0	3	0												Combination with EZHinhibitor	1	28	0		Combination with lena	0	10	0		Combination with CDKinhibitor	0	14	0		Combination with DPX-survivac	0	16	0
Monotherapy	0	59	1												Combination with CD20单抗	0	4	0												Combination with EZHinhibitor	1	29	0		Combination with lena	0	11	0		Combination with CDKinhibitor	0	15	0		Combination with DPX-survivac	0	17	0
Monotherapy	0	60	1												Combination with CD20单抗	0	5	0																	Combination with lena	0	12	0		Combination with CDKinhibitor	0	16	0		Combination with DPX-survivac	0	18	0
Monotherapy	0	61	1												Combination with CD20单抗	0	6	0																	Combination with lena	0	13	0		Combination with CDKinhibitor	0	17	0		Combination with DPX-survivac	0	19	0
Monotherapy	0	62	1												Combination with CD20单抗	0	7	0																	Combination with lena	0	14	0		Combination with CDKinhibitor	0	18	0		Combination with DPX-survivac	0	20	0
Monotherapy	0	63	1												Combination with CD20单抗	0	8	0																	Combination with lena	0	15	0		Combination with CDKinhibitor	0	19	0		Combination with DPX-survivac	0	21	0
Monotherapy	0	64	1												Combination with CD20单抗	0	9	0																	Combination with lena	0	16	0		Combination with CDKinhibitor	0	20	0		Combination with DPX-survivac	0	22	0
Monotherapy	0	65	1												Combination with CD20单抗	1	10	0																	Combination with lena	0	17	0		Combination with CDKinhibitor	0	21	0		Combination with DPX-survivac	0	23	0
Monotherapy	0	66	1												Combination with CD20单抗	1	11	0																	Combination with lena	0	18	0		Combination with CDKinhibitor	0	22	0		Combination with DPX-survivac	1	24	0
Monotherapy	0	67	1												Combination with CD20单抗	0	12	0																	Combination with lena	0	19	0		Combination with CDKinhibitor	0	23	0		Combination with DPX-survivac	0	25	0
Monotherapy	0	68	1												Combination with CD20单抗	0	13	0																	Combination with lena	0	20	0		Combination with CDKinhibitor	0	24	0		Combination with DPX-survivac	0	26	0
Monotherapy	0	69	1												Combination with CD20单抗	1	14	0																	Combination with lena	0	21	0		Combination with CDKinhibitor	0	25	0		Combination with DPX-survivac	0	27	0
Monotherapy	0	70	1												Combination with CD20单抗	1	15	0																	Combination with lena	0	22	0		Combination with CDKinhibitor	2	26	0		Combination with DPX-survivac	0	28	0
Monotherapy	0	71	1												Combination with CD20单抗	0	16	0																	Combination with lena	0	23	0		Combination with CDKinhibitor	0	27	0		Combination with DPX-survivac	1	29	0
Monotherapy	0	72	1												Combination with CD20单抗	0	17	0																	Combination with lena	0	24	0		Combination with CDKinhibitor	0	28	0		Combination with DPX-survivac	1	30	0
Monotherapy	1	0	0												Combination with CD20单抗	0	18	0																	Combination with lena	0	25	0		Combination with CDKinhibitor	2	29	0		Combination with DPX-survivac	0	31	0
Monotherapy	2	1	0												Combination with CD20单抗	0	19	0																	Combination with lena	0	26	0		Combination with CDKinhibitor	0	30	0		Combination with DPX-survivac	0	32	0
Monotherapy	0	2	0												Combination with CD20单抗	1	20	0																	Combination with lena	0	27	0		Combination with CDKinhibitor	0	31	0		Combination with DPX-survivac	0	33	0
Monotherapy	1	3	0												Combination with CD20单抗	1	21	0																	Combination with lena	0	28	0		Combination with CDKinhibitor	0	32	0		Combination with DPX-survivac	0	34	0
Monotherapy	1	4	0												Combination with CD20单抗	1	22	0																	Combination with lena	0	29	0		Combination with CDKinhibitor	0	33	0		Combination with DPX-survivac	0	35	0
Monotherapy	0	5	0												Combination with CD20单抗	0	23	0																	Combination with lena	0	30	0		Combination with CDKinhibitor	0	34	0		Combination with DPX-survivac	0	36	0
Monotherapy	0	6	0												Combination with CD20单抗	1	24	0																	Combination with lena	0	31	0		Combination with CDKinhibitor	0	35	0		Combination with DPX-survivac	0	37	0
Monotherapy	3	7	0												Combination with CD20单抗	0	25	0																	Combination with lena	0	32	0		Combination with CDKinhibitor	0	36	0		Combination with DPX-survivac	1	38	0
Monotherapy	3	8	0												Combination with CD20单抗	1	26	0																	Combination with lena	0	33	0		Combination with CDKinhibitor	0	37	0		Combination with DPX-survivac	0	39	0
Monotherapy	3	9	0												Combination with CD20单抗	0	27	0																	Combination with lena	0	34	0		Combination with CDKinhibitor	0	38	0		Combination with DPX-survivac	1	40	0
Monotherapy	4	10	0												Combination with CD20单抗	1	28	0																	Combination with lena	0	35	0		Combination with CDKinhibitor	0	39	0		Combination with DPX-survivac	0	41	0
Monotherapy	3	11	0												Combination with CD20单抗	0	29	0																	Combination with lena	1	36	0		Combination with CDKinhibitor	0	40	0
Monotherapy	2	12	0												Combination with CD20单抗	0	30	0																	Combination with lena	0	37	0		Combination with CDKinhibitor	0	41	0
Monotherapy	2	13	0												Combination with CD20单抗	0	31	0																	Combination with lena	0	38	0		Combination with CDKinhibitor	0	42	0
Monotherapy	2	14	0												Combination with CD20单抗	0	32	0																	Combination with lena	2	39	0		Combination with CDKinhibitor	2	43	0
Monotherapy	2	15	0												Combination with CD20单抗	0	33	0																	Combination with lena	1	40	0
Monotherapy	1	16	0												Combination with CD20单抗	0	34	0																	Combination with lena	0	41	0
Monotherapy	2	17	0												Combination with CD20单抗	0	35	0																	Combination with lena	0	42	0
Monotherapy	3	18	0												Combination with CD20单抗	0	36	0																	Combination with lena	0	43	0
Monotherapy	2	19	0												Combination with CD20单抗	0	37	0																	Combination with lena	1	44	0
Monotherapy	0	20	0												Combination with CD20单抗	0	38	0																	Combination with lena	2	45	0
Monotherapy	2	21	0												Combination with CD20单抗	0	39	0																	Combination with lena	0	46	0
Monotherapy	0	22	0												Combination with CD20单抗	0	40	0																	Combination with lena	0	47	0
Monotherapy	0	23	0												Combination with CD20单抗	1	41	0
Monotherapy	1	24	0												Combination with CD20单抗	0	42	0
Monotherapy	0	25	0												Combination with CD20单抗	0	43	0
Monotherapy	0	26	0												Combination with CD20单抗	1	44	0
Monotherapy	0	27	0												Combination with CD20单抗	0	45	0
Monotherapy	0	28	0												Combination with CD20单抗	0	46	0
Monotherapy	0	29	0												Combination with CD20单抗	0	47	0
Monotherapy	0	30	0												Combination with CD20单抗	0	48	0
Monotherapy	0	31	0												Combination with CD20单抗	0	49	0
Monotherapy	0	32	0												Combination with CD20单抗	0	50	0
Monotherapy	0	33	0												Combination with CD20单抗	0	51	0
Monotherapy	0	34	0												Combination with CD20单抗	0	52	0
Monotherapy	0	35	0												Combination with CD20单抗	0	53	0
Monotherapy	0	36	0												Combination with CD20单抗	1	54	0
Monotherapy	0	37	0
Monotherapy	0	38	0
Monotherapy	0	39	0
Monotherapy	0	40	0
Monotherapy	0	41	0
Monotherapy	0	42	0
Monotherapy	0	43	0
Monotherapy	0	44	0
Monotherapy	0	45	0
Monotherapy	0	46	0
Monotherapy	0	47	0
Monotherapy	0	48	0
Monotherapy	0	49	0
Monotherapy	1	50	0
Monotherapy	1	51	0
Monotherapy	0	52	0
Monotherapy	1	53	0
Monotherapy	0	54	0
Monotherapy	0	55	0
Monotherapy	1	56	0
Monotherapy	0	57	0
Monotherapy	0	58	0
Monotherapy	0	59	0
Monotherapy	0	60	0
Monotherapy	0	61	0
Monotherapy	0	62	0
Monotherapy	0	63	0
Monotherapy	0	64	0
Monotherapy	0	65	0
Monotherapy	0	66	0
Monotherapy	0	67	0
Monotherapy	0	68	0
Monotherapy	0	69	0
Monotherapy	0	70	0
Monotherapy	1	71	0
Monotherapy	0	72	0
