# Supplementary material for: Comparison of anti-PD-1/PD-L1-based regimens in relapsed/refractory diffuse large B-cell lymphoma: a meta-analysis
Source: PeerJ journal article supplement (doi:10.7717/peerj.20314), 2025-11-19
Supplement: raw_data.zip [file PFS data.xlsx]

## Sheet: Sheet1
group	n	PFS	status		group	n	PFS	status			group	n	PFS	status		group	n	PFS	status		group	n	PFS	status		group	n	PFS	status		group	n	PFS	status		group	n	PFS	status		group	n	PFS	status		group	n	PFS	status
Monotherapy	36	0	1		Combination with BTKi	14	0	1			Combination with CD20mAb+BEN	3	0	1		Combination with CD20mAb	4	0	1		Combination with chemothrapy	1	0	1		Combination with CART	0	0	1		Combination with CD38mAb	9	0	1		Combination with EZHinhibitor	6	0	1		Combination with lena	2	0	1		Combination with CDKinhibitor	2	0	1
Monotherapy	84	1	1		Combination with BTKi	50	1	1			Combination with CD20mAb+BEN	6	1	1		Combination with CD20mAb	13	1	1		Combination with chemothrapy	7	1	1		Combination with CART	2.96896	1	1		Combination with CD38mAb	3	1	1		Combination with EZHinhibitor	14	1	1		Combination with lena	0.00036	1	1		Combination with CDKinhibitor	13	1	1
Monotherapy	11	2	1		Combination with BTKi	16	2	1			Combination with CD20mAb+BEN	3	2	1		Combination with CD20mAb	12	2	1		Combination with chemothrapy	5	2	1		Combination with CART	1.00586	2	1		Combination with CD38mAb	4	2	1		Combination with EZHinhibitor	12	2	1		Combination with lena	4	2	1		Combination with CDKinhibitor	11	2	1
Monotherapy	6	3	1		Combination with BTKi	6	3	1			Combination with CD20mAb+BEN	0	3	1		Combination with CD20mAb	3	3	1		Combination with chemothrapy	5	3	1		Combination with CART	1.00612	3	1		Combination with CD38mAb	0	3	1		Combination with EZHinhibitor	3	3	1		Combination with lena	0.0243	3	1		Combination with CDKinhibitor	2	3	1
Monotherapy	3	4	1		Combination with BTKi	12	4	1			Combination with CD20mAb+BEN	1	4	1		Combination with CD20mAb	1.02833	4	1		Combination with chemothrapy	7.04913	4	1		Combination with CART	3.02226	4	1		Combination with CD38mAb	0	4	1		Combination with EZHinhibitor	0	4	1		Combination with lena	1	4	1		Combination with CDKinhibitor	5	4	1
Monotherapy	2	5	1		Combination with BTKi	2	5	1			Combination with CD20mAb+BEN	0	5	1		Combination with CD20mAb	1	5	1		Combination with chemothrapy	3	5	1		Combination with CART	1.00586	5	1		Combination with CD38mAb	0	5	1		Combination with EZHinhibitor	0	5	1		Combination with lena	4	5	1		Combination with CDKinhibitor	1e-06	5	1
Monotherapy	1	6	1		Combination with BTKi	2	6	1			Combination with CD20mAb+BEN	0	6	1		Combination with CD20mAb	1.02833	6	1		Combination with chemothrapy	2	6	1		Combination with CART	3	6	1		Combination with CD38mAb	0	6	1		Combination with EZHinhibitor	1	6	1		Combination with lena	1e-06	6	1		Combination with CDKinhibitor	2	6	1
Monotherapy	0	7	1		Combination with BTKi	4	7	1			Combination with CD20mAb+BEN	0	7	1		Combination with CD20mAb	0	7	1		Combination with chemothrapy	2	7	1		Combination with CART	0	7	1		Combination with CD38mAb	0	7	1		Combination with EZHinhibitor	0	7	1		Combination with lena	0	7	1		Combination with CDKinhibitor	0	7	1
Monotherapy	4	8	1		Combination with BTKi	0	8	1			Combination with CD20mAb+BEN	2	8	1		Combination with CD20mAb	1e-06	8	1		Combination with chemothrapy	0	8	1		Combination with CART	0	8	1		Combination with CD38mAb	0	0	0		Combination with EZHinhibitor	0	8	1		Combination with lena	0	8	1		Combination with CDKinhibitor	0	8	1
Monotherapy	0	9	1		Combination with BTKi	0	9	1			Combination with CD20mAb+BEN	0	9	1		Combination with CD20mAb	0	9	1		Combination with chemothrapy	3	9	1		Combination with CART	1.99889	9	1		Combination with CD38mAb	0	1	0		Combination with EZHinhibitor	0.959621	9	1		Combination with lena	0	9	1		Combination with CDKinhibitor	0	9	1
Monotherapy	1	10	1		Combination with BTKi	2	10	1			Combination with CD20mAb+BEN	0	10	1		Combination with CD20mAb	1e-06	10	1		Combination with chemothrapy	1	10	1		Combination with CART	0	10	1		Combination with CD38mAb	0	2	0		Combination with EZHinhibitor	1	10	1		Combination with lena	0	10	1		Combination with CDKinhibitor	0	10	1
Monotherapy	1	11	1		Combination with BTKi	0	11	1			Combination with CD20mAb+BEN	0	11	1		Combination with CD20mAb	3	11	1		Combination with chemothrapy	0.010993	11	1		Combination with CART	0	11	1		Combination with CD38mAb	0	3	0		Combination with EZHinhibitor	1e-06	11	1		Combination with lena	0	11	1		Combination with CDKinhibitor	0	11	1
Monotherapy	0	12	1		Combination with BTKi	0	12	1			Combination with CD20mAb+BEN	0	12	1		Combination with CD20mAb	1e-06	12	1		Combination with chemothrapy	1	12	1		Combination with CART	0	12	1		Combination with CD38mAb	0	4	0		Combination with EZHinhibitor	0	12	1		Combination with lena	0	12	1		Combination with CDKinhibitor	0	12	1
Monotherapy	2	13	1		Combination with BTKi	2	13	1			Combination with CD20mAb+BEN	0	13	1		Combination with CD20mAb	0	13	1		Combination with chemothrapy	0.010993	13	1		Combination with CART	0	13	1		Combination with CD38mAb	0	5	0		Combination with EZHinhibitor	1.00464	13	1		Combination with lena	0	13	1		Combination with CDKinhibitor	0	13	1
Monotherapy	1	14	1		Combination with BTKi	2	14	1			Combination with CD20mAb+BEN	0	14	1		Combination with CD20mAb	0	14	1		Combination with chemothrapy	1	14	1		Combination with CART	0	14	1		Combination with CD38mAb	0	6	0		Combination with EZHinhibitor	1.00506	14	1		Combination with lena	0	14	1		Combination with CDKinhibitor	0	14	1
Monotherapy	0	15	1		Combination with BTKi	0	15	1			Combination with CD20mAb+BEN	0	15	1		Combination with CD20mAb	1	15	1		Combination with chemothrapy	0	15	1		Combination with CART	0	15	1		Combination with CD38mAb	1	7	0		Combination with EZHinhibitor	0	15	1		Combination with lena	0	0	0		Combination with CDKinhibitor	1	15	1
Monotherapy	0	16	1		Combination with BTKi	0	16	1			Combination with CD20mAb+BEN	0	16	1		Combination with CD20mAb	0	16	1		Combination with chemothrapy	1	16	1		Combination with CART	0	16	1							Combination with EZHinhibitor	0	16	1		Combination with lena	1	1	0		Combination with CDKinhibitor	0	16	1
Monotherapy	0	17	1		Combination with BTKi	0	17	1			Combination with CD20mAb+BEN	0	17	1		Combination with CD20mAb	0	17	1		Combination with chemothrapy	0	0	0		Combination with CART	0	17	1							Combination with EZHinhibitor	0	17	1		Combination with lena	1	2	0		Combination with CDKinhibitor	0	17	1
Monotherapy	1	18	1		Combination with BTKi	0	18	1			Combination with CD20mAb+BEN	0	18	1		Combination with CD20mAb	0	18	1		Combination with chemothrapy	0	1	0		Combination with CART	0	18	1							Combination with EZHinhibitor	0	18	1		Combination with lena	0	3	0		Combination with CDKinhibitor	0	18	1
Monotherapy	0	19	1		Combination with BTKi	0	19	1			Combination with CD20mAb+BEN	0	19	1		Combination with CD20mAb	0	19	1		Combination with chemothrapy	0	2	0		Combination with CART	0	19	1							Combination with EZHinhibitor	0	19	1		Combination with lena	0	4	0		Combination with CDKinhibitor	0	19	1
Monotherapy	0	20	1		Combination with BTKi	2	20	1			Combination with CD20mAb+BEN	0	20	1		Combination with CD20mAb	0	20	1		Combination with chemothrapy	0	3	0		Combination with CART	0	20	1							Combination with EZHinhibitor	2	20	1		Combination with lena	1	5	0		Combination with CDKinhibitor	0	20	1
Monotherapy	0	21	1		Combination with BTKi	0	21	1			Combination with CD20mAb+BEN	0	21	1		Combination with CD20mAb	0	21	1		Combination with chemothrapy	0	4	0		Combination with CART	0	21	1							Combination with EZHinhibitor	1e-06	21	1		Combination with lena	0	6	0		Combination with CDKinhibitor	0	21	1
Monotherapy	0	22	1		Combination with BTKi	4	0	0			Combination with CD20mAb+BEN	0	22	1		Combination with CD20mAb	0	22	1		Combination with chemothrapy	2	5	0		Combination with CART	0	22	1							Combination with EZHinhibitor	0	22	1		Combination with lena	0	7	0		Combination with CDKinhibitor	0	22	1
Monotherapy	0	23	1		Combination with BTKi	0	1	0			Combination with CD20mAb+BEN	0	0	0		Combination with CD20mAb	1	23	1		Combination with chemothrapy	0	6	0		Combination with CART	0	0	0							Combination with EZHinhibitor	0	23	1		Combination with lena	1	8	0		Combination with CDKinhibitor	0	23	1
Monotherapy	0	24	1		Combination with BTKi	0	2	0			Combination with CD20mAb+BEN	1	1	0		Combination with CD20mAb	0	24	1		Combination with chemothrapy	0	7	0		Combination with CART	0	1	0							Combination with EZHinhibitor	0	0	0		Combination with lena	1	9	0		Combination with CDKinhibitor	0	24	1
Monotherapy	0	25	1		Combination with BTKi	0	3	0			Combination with CD20mAb+BEN	0	2	0		Combination with CD20mAb	0	25	1		Combination with chemothrapy	0	8	0		Combination with CART	0	2	0							Combination with EZHinhibitor	0	1	0		Combination with lena	1	10	0		Combination with CDKinhibitor	0	25	1
Monotherapy	0	26	1		Combination with BTKi	4	4	0			Combination with CD20mAb+BEN	0	3	0		Combination with CD20mAb	0	26	1		Combination with chemothrapy	0	9	0		Combination with CART	0	3	0							Combination with EZHinhibitor	0	2	0		Combination with lena	0	11	0		Combination with CDKinhibitor	0	0	0
Monotherapy	0	27	1		Combination with BTKi	0	5	0			Combination with CD20mAb+BEN	0	4	0		Combination with CD20mAb	0	27	1		Combination with chemothrapy	0	10	0		Combination with CART	0	4	0							Combination with EZHinhibitor	0	3	0		Combination with lena	0	12	0		Combination with CDKinhibitor	0	1	0
Monotherapy	0	28	1		Combination with BTKi	0	6	0			Combination with CD20mAb+BEN	0	5	0		Combination with CD20mAb	0	28	1		Combination with chemothrapy	0	11	0		Combination with CART	0	5	0							Combination with EZHinhibitor	0	4	0		Combination with lena	0	13	0		Combination with CDKinhibitor	0	2	0
Monotherapy	0	29	1		Combination with BTKi	0	7	0			Combination with CD20mAb+BEN	0	6	0		Combination with CD20mAb	0	29	1		Combination with chemothrapy	0	12	0		Combination with CART	0	6	0							Combination with EZHinhibitor	0	5	0		Combination with lena	1	14	0		Combination with CDKinhibitor	0	3	0
Monotherapy	0	30	1		Combination with BTKi	0	8	0			Combination with CD20mAb+BEN	1	7	0		Combination with CD20mAb	0	30	1		Combination with chemothrapy	1	13	0		Combination with CART	1	7	0							Combination with EZHinhibitor	0	6	0							Combination with CDKinhibitor	0	4	0
Monotherapy	0	31	1		Combination with BTKi	0	9	0			Combination with CD20mAb+BEN	0	8	0		Combination with CD20mAb	0	31	1		Combination with chemothrapy	0	14	0		Combination with CART	1	8	0							Combination with EZHinhibitor	0	7	0							Combination with CDKinhibitor	0	5	0
Monotherapy	0	32	1		Combination with BTKi	6	10	0			Combination with CD20mAb+BEN	0	9	0		Combination with CD20mAb	0	32	1		Combination with chemothrapy	1	15	0		Combination with CART	0	9	0							Combination with EZHinhibitor	0	8	0							Combination with CDKinhibitor	0	6	0
Monotherapy	0	33	1		Combination with BTKi	0	11	0			Combination with CD20mAb+BEN	0	10	0		Combination with CD20mAb	0	33	1		Combination with chemothrapy	0	16	0		Combination with CART	1	10	0							Combination with EZHinhibitor	0	9	0							Combination with CDKinhibitor	0	7	0
Monotherapy	0	34	1		Combination with BTKi	0	12	0			Combination with CD20mAb+BEN	1	11	0		Combination with CD20mAb	0	34	1							Combination with CART	0	11	0							Combination with EZHinhibitor	0	10	0							Combination with CDKinhibitor	0	8	0
Monotherapy	0	35	1		Combination with BTKi	2	13	0			Combination with CD20mAb+BEN	1	12	0		Combination with CD20mAb	0	35	1							Combination with CART	0	12	0							Combination with EZHinhibitor	0	11	0							Combination with CDKinhibitor	0	9	0
Monotherapy	0	36	1		Combination with BTKi	2	14	0			Combination with CD20mAb+BEN	1	13	0		Combination with CD20mAb	0	36	1							Combination with CART	1	13	0							Combination with EZHinhibitor	0	12	0							Combination with CDKinhibitor	0	10	0
Monotherapy	0	37	1		Combination with BTKi	6	15	0			Combination with CD20mAb+BEN	0	14	0		Combination with CD20mAb	0	37	1							Combination with CART	0	14	0							Combination with EZHinhibitor	0	13	0							Combination with CDKinhibitor	0	11	0
Monotherapy	0	38	1		Combination with BTKi	2	16	0			Combination with CD20mAb+BEN	0	15	0		Combination with CD20mAb	0	38	1							Combination with CART	0	15	0							Combination with EZHinhibitor	0	14	0							Combination with CDKinhibitor	0	12	0
Monotherapy	0	39	1		Combination with BTKi	0	17	0			Combination with CD20mAb+BEN	0	16	0		Combination with CD20mAb	0	39	1							Combination with CART	0	16	0							Combination with EZHinhibitor	0	15	0							Combination with CDKinhibitor	0	13	0
Monotherapy	0	40	1		Combination with BTKi	8	18	0			Combination with CD20mAb+BEN	0	17	0		Combination with CD20mAb	0	40	1							Combination with CART	0	17	0							Combination with EZHinhibitor	0	16	0							Combination with CDKinhibitor	0	14	0
Monotherapy	0	41	1		Combination with BTKi	2	19	0			Combination with CD20mAb+BEN	0	18	0		Combination with CD20mAb	0	41	1							Combination with CART	0	18	0							Combination with EZHinhibitor	0	17	0							Combination with CDKinhibitor	0	15	0
Monotherapy	0	42	1		Combination with BTKi	4	20	0			Combination with CD20mAb+BEN	0	19	0		Combination with CD20mAb	0	42	1							Combination with CART	0	19	0							Combination with EZHinhibitor	0	18	0							Combination with CDKinhibitor	0	16	0
Monotherapy	0	43	1		Combination with BTKi	0	21	0			Combination with CD20mAb+BEN	0	20	0		Combination with CD20mAb	0	43	1							Combination with CART	1	20	0							Combination with EZHinhibitor	0	19	0							Combination with CDKinhibitor	0	17	0
Monotherapy	0	44	1								Combination with CD20mAb+BEN	1	21	0		Combination with CD20mAb	0	44	1							Combination with CART	0	21	0							Combination with EZHinhibitor	0	20	0							Combination with CDKinhibitor	0	18	0
Monotherapy	0	45	1								Combination with CD20mAb+BEN	0	22	0		Combination with CD20mAb	0	45	1							Combination with CART	1	22	0							Combination with EZHinhibitor	0	21	0							Combination with CDKinhibitor	0	19	0
Monotherapy	0	46	1													Combination with CD20mAb	0	46	1																	Combination with EZHinhibitor	0	22	0							Combination with CDKinhibitor	0	20	0
Monotherapy	0	47	1													Combination with CD20mAb	0	47	1																	Combination with EZHinhibitor	1	23	0							Combination with CDKinhibitor	0	21	0
Monotherapy	0	48	1													Combination with CD20mAb	0	48	1																											Combination with CDKinhibitor	0	22	0
Monotherapy	0	49	1													Combination with CD20mAb	0	49	1																											Combination with CDKinhibitor	1	23	0
Monotherapy	3	0	0													Combination with CD20mAb	0	50	1																											Combination with CDKinhibitor	0	24	0
Monotherapy	2	1	0													Combination with CD20mAb	0	51	1																											Combination with CDKinhibitor	1	25	0
Monotherapy	3	2	0													Combination with CD20mAb	0	52	1
Monotherapy	1	3	0													Combination with CD20mAb	0	53	1
Monotherapy	1	4	0													Combination with CD20mAb	0	54	1
Monotherapy	1	5	0													Combination with CD20mAb	0	0	0
Monotherapy	0	6	0													Combination with CD20mAb	0	1	0
Monotherapy	2	7	0													Combination with CD20mAb	1	2	0
Monotherapy	0	8	0													Combination with CD20mAb	0	3	0
Monotherapy	0	9	0													Combination with CD20mAb	1	4	0
Monotherapy	1	10	0													Combination with CD20mAb	0	5	0
Monotherapy	0	11	0													Combination with CD20mAb	1	6	0
Monotherapy	0	12	0													Combination with CD20mAb	1	7	0
Monotherapy	2	13	0													Combination with CD20mAb	0	8	0
Monotherapy	0	14	0													Combination with CD20mAb	1	9	0
Monotherapy	1	15	0													Combination with CD20mAb	0	10	0
Monotherapy	0	16	0													Combination with CD20mAb	0	11	0
Monotherapy	0	17	0													Combination with CD20mAb	0	12	0
Monotherapy	0	18	0													Combination with CD20mAb	0	13	0
Monotherapy	0	19	0													Combination with CD20mAb	0	14	0
Monotherapy	0	20	0													Combination with CD20mAb	0	15	0
Monotherapy	0	21	0													Combination with CD20mAb	0	16	0
Monotherapy	0	22	0														0	17	0
Monotherapy	0	23	0														0	18	0
Monotherapy	0	24	0														0	19	0
Monotherapy	0	25	0														0	20	0
Monotherapy	0	26	0														0	21	0
Monotherapy	0	27	0														0	22	0
Monotherapy	0	28	0														0	23	0
Monotherapy	0	29	0														0	24	0
Monotherapy	0	30	0														0	25	0
Monotherapy	0	31	0														0	26	0
Monotherapy	0	32	0														0	27	0
Monotherapy	0	33	0														1	28	0
Monotherapy	0	34	0														0	29	0
Monotherapy	0	35	0														0	30	0
Monotherapy	0	36	0														0	31	0
Monotherapy	0	37	0														0	32	0
Monotherapy	0	38	0														0	33	0
Monotherapy	0	39	0														0	34	0
Monotherapy	0	40	0														1	35	0
Monotherapy	0	41	0														0	36	0
Monotherapy	0	42	0														0	37	0
Monotherapy	0	43	0														0	38	0
Monotherapy	0	44	0														0	39	0
Monotherapy	0	45	0														0	40	0
Monotherapy	0	46	0														0	41	0
Monotherapy	0	47	0														0	42	0
Monotherapy	2	48	0														0	43	0
Monotherapy	0	49	0														1	44	0
																	0	45	0
																	0	46	0
																	0	47	0
																	0	48	0
																	0	49	0
																	0	50	0
																	0	51	0
																	0	52	0
																	0	53	0
																	1	54	0
