# Supplementary material for: Comparison of anti-PD-1/PD-L1-based regimens in relapsed/refractory diffuse large B-cell lymphoma: a meta-analysis
Source: PeerJ journal article supplement (doi:10.7717/peerj.20314), 2025-11-19
Supplement: raw_data.zip [file response data.xlsx]

## Sheet: Sheet1
	study	CRR	ORR	n	CR	OR
Monotherapy	CHECKMATE-139a	0.034	0.103	87	3	9
	CHECKMATE-139b	0	0.029	34	0	1
	CHECKMATE-039a	0.181	0.364	11	2	4
	NCT02650999	0.091	0.273	11	1	3
	KEYNOTE-013a	0.073	0.122	41	3	5
	FUSION NHL-001a	0	0	10	0	0
Combination with BTKi	NCT02401048a	0.062	0.125	16	1	2
	NCT02401048b	0.312	0.375	16	5	6
	LYM1002	0.156	0.365	45	7	16
	NCT02795182	0.148	0.37	27	4	10
	KEYNOTE-145	0.066	0.262	61	4	16
	L.Zuo,2022	0.4	0.7	10	4	7
Combination with CD20 mAb	Y.Qin,2023	0.077	0.5	26	2	13
	NCT02220842	0.043	0.174	23	1	4
Combination with CD20mAb+BEN	FUSION NHL-001b	0.1	0.3	10	1	3
	JAVELIN	0.273	0.273	11	3	3
Combination with CD20mAb+PV	NCT02729896	0.125	0.25	16	2	4
Combination with chemothrapy	ARGO	0.122	0.39	41	5	16
Combination with CART	J.Mu,2022	0.423	0.654	26	11	17
	ZUMA-6	0.464	0.75	28	13	21
	PORTIA	0.333	0.5	12	4	6
	ALEXANDER	0.625	0.75	8	5	6
	NCT04539444	0.615	0.846	13	8	11
Combination with CD20mAb+BCL2i	NCT03276468	0.172	0.241	58	10	14
Combination with CTLA4 mAb	CHECKMATE-039b	0.091	0.182	11	1	2
Combination with 4-1BB agonist	NCT02253992	0	0	22	0	0
Combination with EZH2i	NCT02220842	0.07	0.163	43	3	7
Combination with IDOi	KEYNOTE-037	NA	0.192	26	NA	5
Combination with CD38mAb	NCT03769181	0.059	0.059	17	1	1
Combination with KIRi	NCT01592370	0	0.115	26	0	3
Combination with lenalidomide	KEYNOTE-013b	0.222	0.389	18	4	7
Combination with CDKi	KEYNOTE-155	0.105	0.211	38	4	8
Combination with STAT3i	NCT02549651	0	0.069	29	0	2
Combination with CD3-CD19 BsAb	NCT03340766	0.193	0.323	31	6	10
Combination with DPX-S	SPIREL	0.158	0.368	19	3	7
Combination with LAG-3 mAb	NCT03598608	0.04	0.12	25	1	3
